# Supplementary material for: Effect of graphene incorporation in carbon nanofiber decorated with TiO2 for photoanode applications
Source: Royal Society of Chemistry journal article supplement (doi:10.1039/c6ra26301a), 2017-01-01
Supplement: c6ra26301a1.pdf [file c6ra26301a1.pdf]

## Supporting Information

### Effect of Graphene Incorporation in Carbon Nanofiber Decorated with TiO<sub>2</sub> for Photoanode Applications

Hoik Lee,<sup>†</sup> Nagaishi Tomoki,<sup>†</sup> Nam Duy Phan,<sup>†</sup> Myungwoong Kim,<sup>‡</sup> Ke-Qin Zhang,<sup>//</sup> Kai Wei,<sup>§,\*</sup> and Ick Soo Kim<sup>†,\*</sup>

<sup>a</sup>Nano Fusion Technology Research Lab, Division of Frontier Fibers, Institute for Fiber Engineering (IFES), Interdisciplinary Cluster for Cutting Edge Research, (ICCER), Shinshu University, 3-15-1, Tokida, Ueda, Nagano 386-8567, Japan.

<sup>b</sup>Department of Chemistry, Inha University, Incheon 22212, Korea.

<sup>c</sup>National Engineering Laboratory for Modern Silk College of Textile and Clothing Engineering Department of Polymer Chemistry and Physics, Soochow University, Suzhou, 215123, China.

<sup>d</sup>National Engineering Laboratory for Modern Silk (NESLab), College of Textile and Clothing Engineering, Soochow University, Suzhou, 215123, China.

\*Corresponding authors:

I.S.K., e-mail: kim@shinshu-u.ac.jp, Tel: +81-80-3088-0295

W.K., e-mail: sudaweikai@hotmail.com, Tel: +86-18896953965

KEYWORDS: Dye-sensitized solar cells; Graphene carbon nanofiber; TiO<sub>2</sub>; Photoanode

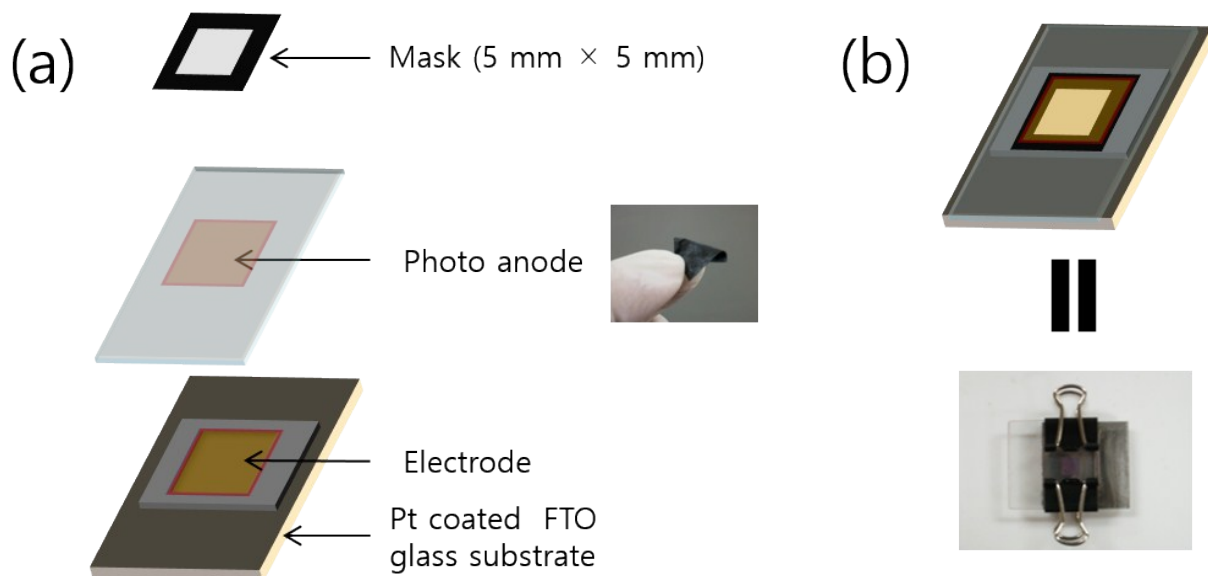

Figure S1. (a) Simple fabrication illustration of DDSC device with prepared photoanode, and (b) its digital photograph.

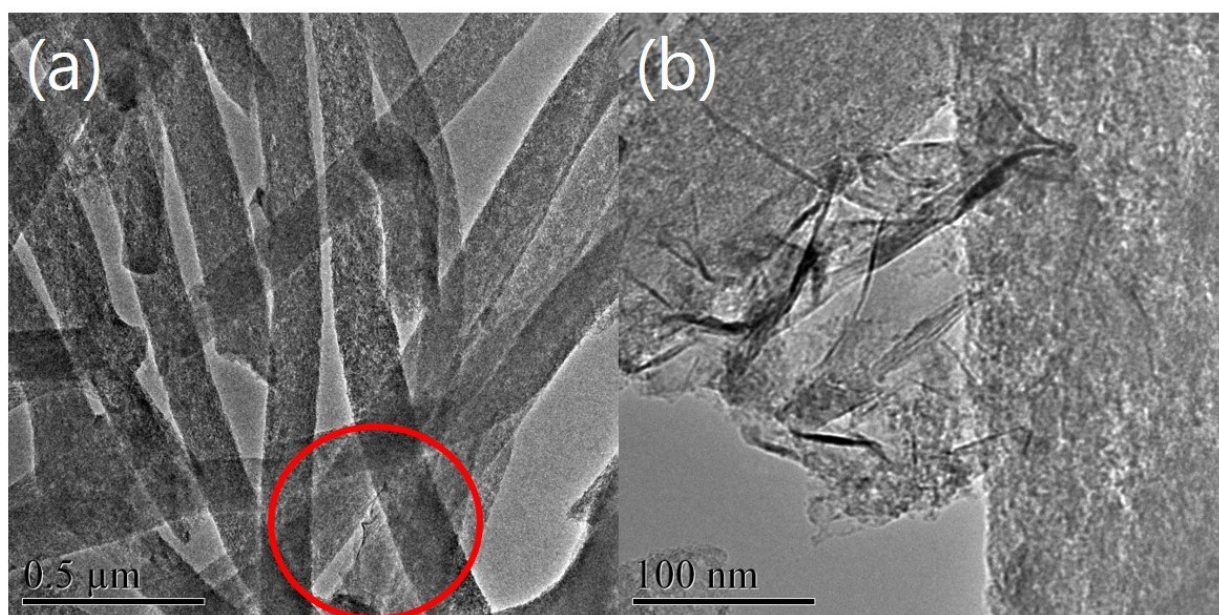

Figure S2. TEM images of rGO incorporated CNF.

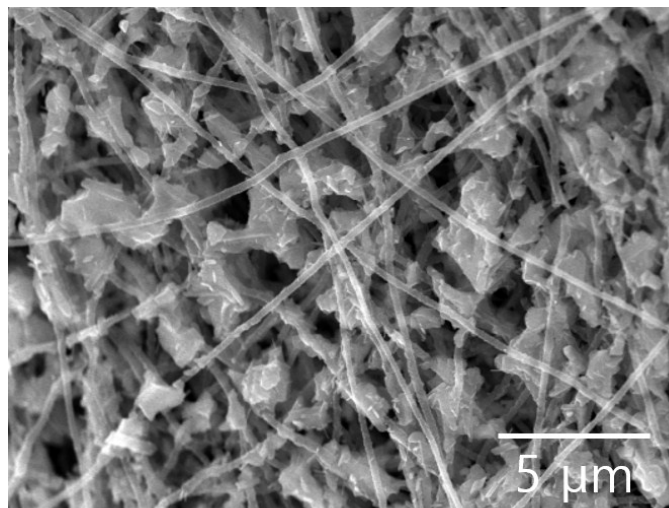

Figure S3. SEM image of TCNF-H
